# Supplementary material for: Electrochemical detection of glutathione based on accelerated CRISPR/Cas12a trans-cleavage with MnO2 nanosheets
Source: Royal Society of Chemistry journal article supplement (doi:10.1039/d3cc06186h), 2024-01-01
Supplement: d3cc06186h1.pdf [file d3cc06186h1.pdf]

*Supporting Information*

**Electrochemical detection of glutathione based on accelerated  
CRISPR/Cas12a trans-cleavage with MnO<sub>2</sub> nanosheets**

Renpeng Xia,<sup>‡a</sup> Nan Ouyang,<sup>‡a</sup> Tingting Wang,<sup>a</sup> Yuan Zhuang,<sup>\*b</sup> and Peng Miao<sup>\*ac</sup>

<sup>a</sup> Suzhou Institute of Biomedical Engineering and Technology, Chinese Academy of Sciences,  
Suzhou 215163, China

<sup>b</sup> Affiliated Hospital of Nantong University, Nantong 226001, China

<sup>c</sup> Tianjin Guoke Medical Technology Development Co, Ltd, Tianjin 300399, China

<sup>‡</sup> These authors contributed equally.

\* Corresponding authors.

E-mail addresses: 834634366@qq.com (Y. Zhuang.); miaopeng@sibet.ac.cn (P. Miao).

# Experimental

## Materials and instruments

Glutathione (GSH), manganese chloride ( $\text{MnCl}_2$ ), sodium chloride (NaCl), tris (2-carboxyethyl)phosphine hydrochloride (TCEP), mercaptohexanol (MCH), hexaammineruthenium(III) chloride ( $[\text{Ru}(\text{NH}_3)_6]^{3+}$ ), arginine, glutamine, glycine, histidine, lysine, leucine, serine, threonine, fructose, sucrose, folic acid, glucose, tetramethylammonium hydroxide and hydrogen peroxide ( $\text{H}_2\text{O}_2$ ) and ITO slides were ordered from Sigma (USA). Cas12a was purchased from New England Biolabs Ltd. (Beijing, China). A colorimetric GSH kit was acquired from Beyotime Biotechnology, Inc. (Shanghai, China). All other chemicals were of analytical grade and used without further purification. Solutions prepared in this work utilized ultrapure water, which was purified by a Millipore water purification system ( $18 \text{ M}\Omega \cdot \text{cm}$ ). DNA and RNA strands were synthesized and purified by Sangon Biotechnology Co. Ltd. (Shanghai, China). The sequences were shown in Table S1. Human serum samples were provided by Affiliated Hospital of Nantong University with written consent from participants (Nantong, China).

TEM image was taken by an FEI Tecnai G20 transmission electron microscope (FEI, USA). UV-vis absorption spectra were obtained by a NanoDrop OneC spectrophotometer (Thermo Scientific, USA). Electrochemical measurements were carried out on a CHI 660E workstation (CH Instruments, China). Polyacrylamide gel (PAGE) image was taken by a GelDoc XR<sup>+</sup> Imaging System (Bio-Rad, USA). Zeta potentials were recorded by a Zetasizer Nano ZS90 at 25°C (Malvern, UK).

## Preparation of $\text{MnO}_2$ NSs

The two-dimensional nanosheets were synthesized according to a previous report.<sup>1</sup> Briefly, tetramethylammonium hydroxide with the concentration of 0.6 M was blended with 3 wt%  $\text{H}_2\text{O}_2$ .

20 mL of  $\text{MnCl}_2$  with the concentration of 0.3 M was added in 40 mL of the above solution. The resulted solution was stirred overnight at room temperature. Next, the bulk  $\text{MnO}_2$  NSs were centrifuged at 2000 rpm for 10 min, which were further washed with distilled water and methanol, respectively. Afterward,  $\text{MnO}_2$  NSs were dried at 60 °C and resuspended with pure water. The NSs were ultrasonicated for 12 h before further use.

### **Preparation of ssDNA modified electrode**

The substrate gold electrode was pretreated. First, it was incubated with piranha solution (98%  $\text{H}_2\text{SO}_4$  : 30%  $\text{H}_2\text{O}_2$  = 3 : 1) for 5 min (*Caution: the solution reacts violently with organic solvents*). After careful rinsing, the electrode was polished with P5000 sand paper and alumina slurry, respectively. The gold electrode was polished to a mirror-like surface, which was further ultrasonicated. Next, the electrode was scanned by cyclic voltammetry in 500 mM  $\text{H}_2\text{SO}_4$  for electrochemical cleaning. After rinsing with pure water, it was incubated with 0.8  $\mu\text{M}$  ssDNA for 8 h and then 1 mM MCH for 0.5 h.

### **GSH-mediated NSs digestion and $\text{Mn}^{2+}$ -assisted CRISPR/Cas12a cleavage**

Cas12a/crRNA complexes were assembled by incubating Cas12a and crRNA with the concentrations of 200 nM for 20 min. Standard GSH solutions with a series of concentrations were then prepared. After blending GSH with  $\text{MnO}_2$  NSs with the concentration of 60  $\mu\text{g mL}^{-1}$ , 100  $\mu\text{L}$  of the solution was then mixed with 150  $\mu\text{L}$  of Cas12a/crRNA and 50  $\mu\text{L}$  of DNA duplex (dsDNA-1 and dsDNA-2) (300 nM). ssDNA modified electrode was incubated with the above solution for 15 min.

### **Electrochemical detection**

Electrochemical measurements were performed on a CHI660D electrochemical analyzer (CH Instruments, China) with a traditional three-electrode system. The electrochemical properties of

the working electrode were studied by CC, CV, EIS, and SWV. The electrolyte for CV and EIS was 5 mM  $[\text{Fe}(\text{CN})_6]^{3-/4-}$  containing 1 M  $\text{KNO}_3$ . The parameters included 100  $\text{mV s}^{-1}$  scanning rate, 0.21 V biasing potential, 5 mV amplitude, and frequency range from 0.1 to 100000 Hz. The electrolyte for CC was 10 mM Tris-HCl with 50  $\mu\text{M}$   $[\text{Ru}(\text{NH}_3)_6]^{3+}$  (pH 7.4). The electrolyte for SWV was 20 mM Tris-HCl buffer (pH 7.5) containing 160  $\mu\text{M}$  TCEP, 100 mM NaCl and 50 mM  $\text{MgCl}_2$ . The parameters included 60  $\text{mV s}^{-1}$  scanning rate, and scan range from 0.1 to -0.7 V.

### **Polyacrylamide gel electrophoresis**

Electrophoresis was carried out in the Tris-boric acid buffer solution (90 mM, 1 mM EDTA, pH 8.0) at 100 V for 60 min. The collected gel was stained with 4S Red Plus solution. After careful rinsing, the gel was imaged under UV light by a Gel Doc<sup>TM</sup> XR+ Imaging System (Bio-Rad, USA).

### **ITO slide modification and fluorescence observation**

Bare ITO glass slide was cleaned with the solution ( $\text{NH}_4\text{OH} : \text{H}_2\text{O}_2 : \text{H}_2\text{O} = 1 : 1 : 5$ ) for 20 min at 80 °C. After careful rinsing and then dried with nitrogen atmosphere, the glass slide was incubated in 1% APTES prepared in 95% for 1 h and then 10% GA for 2 h. It was rinsed and further incubated with aminated ssDNA-2 for 2 h at room temperature in a humid chamber. The DNA modified ITO glass slide was observed using a Leica TCS SP5 microscope (Leica Microsystems, Germany). To demonstrate the interaction between  $\text{MnO}_2$  NSs and ssDNA-2, the DNA modified ITO glass slide was incubated with  $\text{MnO}_2$  NSs ( $60 \mu\text{g mL}^{-1}$ ) for 15 min before fluorescence observation.

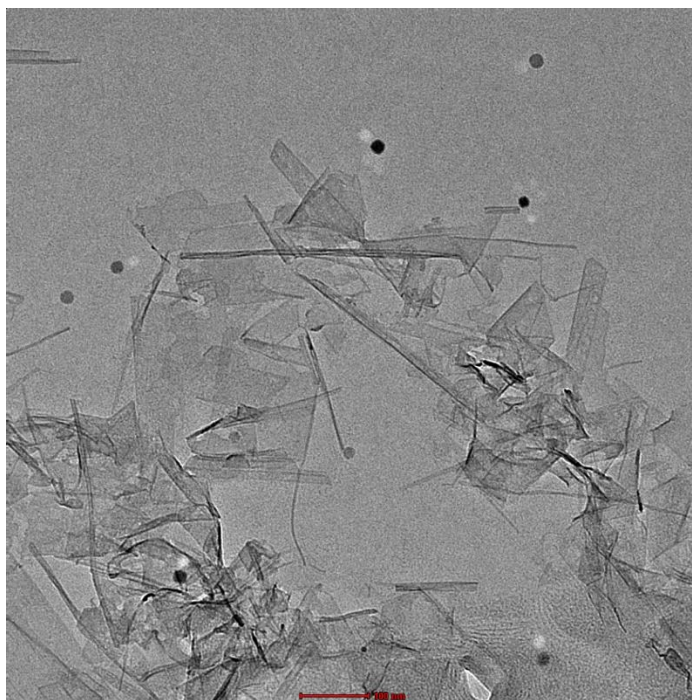

**Figure S1.** TEM image of MnO<sub>2</sub> nanosheets.

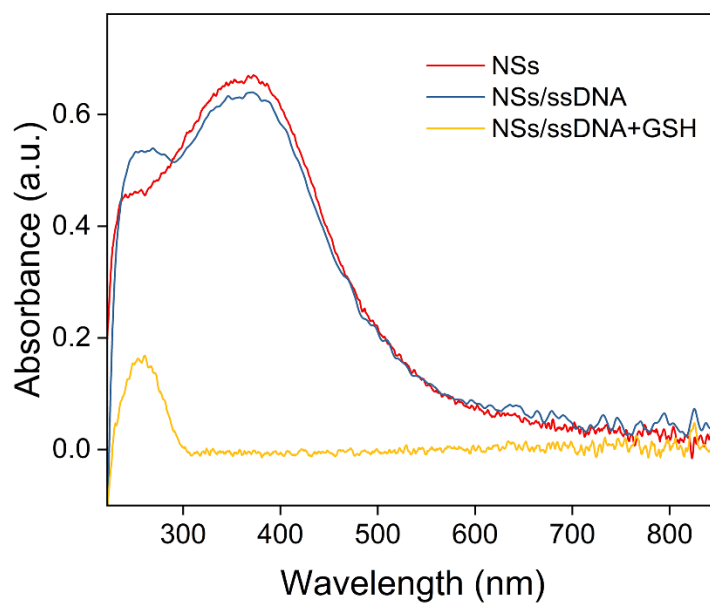

**Figure S2.** UV-vis absorption spectra of MnO<sub>2</sub> nanosheets after interaction with ssDNA in the absence and presence of GSH.

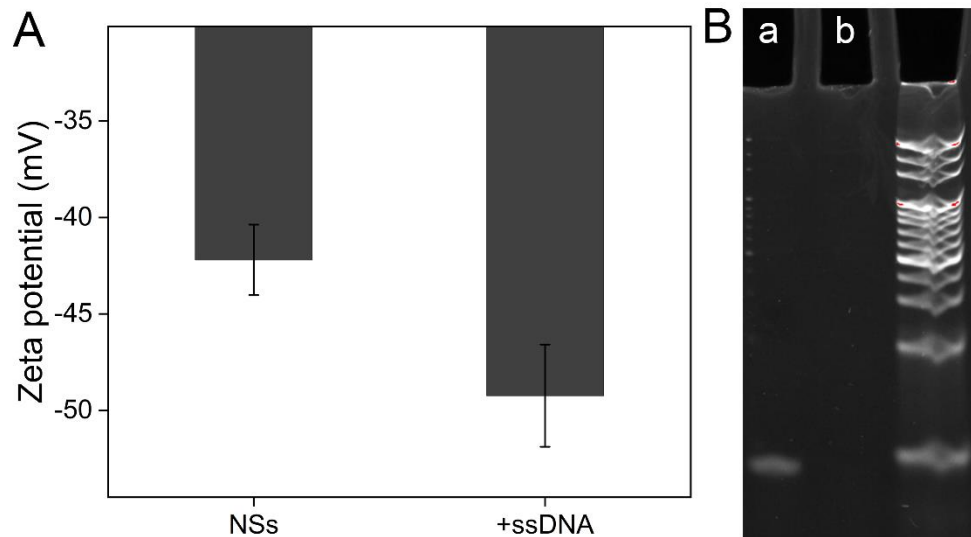

**Figure S3.** (A) Zeta potentials of MnO<sub>2</sub> nanosheets after ssDNA incubation. (B) PAGE image of ssDNA (a) before and (b) after CRISPR/Cas12a trans-cleavage.

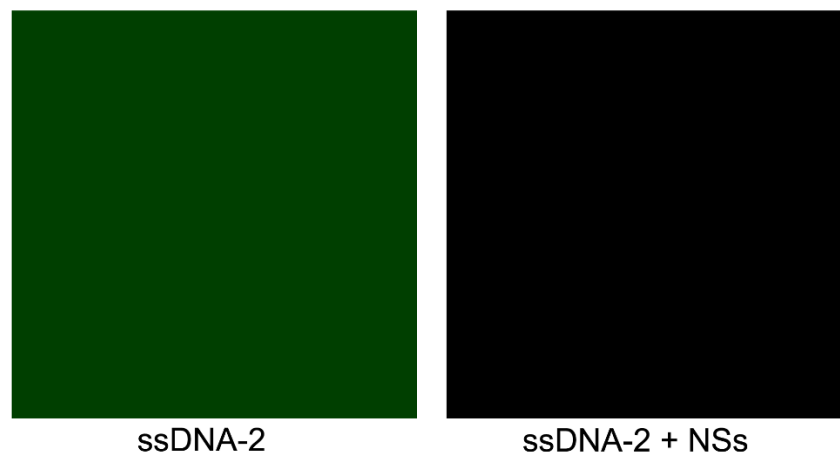

**Figure S4.** Fluorescent images of ssDNA-2 modified ITO slide before and after incubation with MnO<sub>2</sub> NSs.

**Table S1.** DNA and RNA sequences used in this work.

| Name    | Sequence (5' to 3')                                                      |
|---------|--------------------------------------------------------------------------|
| dsDNA-1 | TCATAGTTAGCGTAACGATCTAAAGTTTTGTCGTC                                      |
| dsDNA-2 | GACGACAAAACCTTTAGATCGTTACGCTAACTATGA                                     |
| crRNA   | UAAUUUCUACUAAGUGUAGAUGAUCGUUACGCUAACUAUGA                                |
| ssDNA   | SH-(CH <sub>2</sub> ) <sub>6</sub> -TTTTACGATCGACTTCCG-MB                |
| ssDNA-2 | NH <sub>2</sub> -(CH <sub>2</sub> ) <sub>6</sub> -TTTTACGATCGACTTCCG-FAM |

**Table S2.** Comparison of the analytical performances of recent GSH assays.

| Technique     | Strategy                                                         | Detection range (M)                        | LOD (M)                | Ref       |
|---------------|------------------------------------------------------------------|--------------------------------------------|------------------------|-----------|
| Fluorescence  | double-stranded DNA templated silver nanoparticles               | 0 to $9 \times 10^{-2}$                    | $3.7 \times 10^{-4}$   | 2         |
| MALDI-MS      | $\alpha$ -cyano-4-hydroxycinnamic acid as a reactive matrix      | -                                          | $2 \times 10^{-4}$     | 3         |
| Colorimetry   | FeO <sub>x</sub> /Pt/PEDOT                                       | 0 to $10^{-4}$                             | $10^{-5}$              | 4         |
| Visual sensor | thiol-ene click chemistry and the capillary action principle     | $10^{-5}$ to $10^{-3}$                     | $2 \times 10^{-6}$     | 5         |
| Fluorescence  | disulfide linkage rupture between FRET donor acceptor            | $10^{-6}$ to $10^{-5}$                     | $8 \times 10^{-7}$     | 6         |
| Fluorescence  | near-infrared fluorescent probe based on red shift               | 0 to $1.6 \times 10^{-5}$                  | $2.52 \times 10^{-7}$  | 7         |
| Colorimetry   | copper aspartate nanofibers with multiple enzyme-like activities | 1 to $5 \times 10^{-5}$                    | $2.5 \times 10^{-7}$   | 8         |
| Fluorescence  | Mn-doped ZnS quantum dots and cellulose nanofibrils              | $2 \times 10^{-7}$ to $2 \times 10^{-5}$   | $5.7 \times 10^{-8}$   | 9         |
| Colorimetry   | apigenin catalyzed AuNRs etching                                 | $5 \times 10^{-8}$ to $2 \times 10^{-5}$   | $3.4 \times 10^{-8}$   | 10        |
| CL            | cobalt oxyhydroxide nanoflakes with oxidase-mimicking activity   | $10^{-8}$ to $10^{-6}$                     | $6.4 \times 10^{-9}$   | 11        |
| DPV           | glutathione peroxidase, graphene oxide and nafion                | $3 \times 10^{-9}$ to $3.7 \times 10^{-4}$ | $1.5 \times 10^{-9}$   | 12        |
| ECL           | AgGaS <sub>2</sub> quantum dots                                  | $10^{-11}$ to $10^{-6}$                    | $8.03 \times 10^{-12}$ | 13        |
| SWV           | accelerated CRISPR-Cas12a trans-cleavage                         | $10^{-11}$ to $10^{-5}$                    | $3.5 \times 10^{-12}$  | this work |



**Table S3.** Detection of GSH in serum samples before and after spiking.

| Sample | Spiked ( $\mu\text{M}$ ) | Detected ( $\mu\text{M}$ ) | Elman method<br>( $\mu\text{M}$ ) | RSD (%) | Recovery (%) |
|--------|--------------------------|----------------------------|-----------------------------------|---------|--------------|
| 1      | 1                        | 1.923                      | 1.893                             | 2.351   | 102.328      |
|        | 5                        | 5.837                      | 5.924                             | 3.293   | 92.794       |
| 2      | 1                        | 1.965                      | 2.041                             | 1.535   | 98.469       |
|        | 5                        | 6.014                      | 5.984                             | 1.093   | 103.469      |
| 3      | 1                        | 2.123                      | 2.039                             | 2.305   | 108.712      |
|        | 5                        | 6.102                      | 6.084                             | 1.532   | 106.680      |

## References

1. K. Kai, Y. Yoshida, H. Kageyama, G. Saito, T. Ishigaki, Y. Furukawa and J. Kawamata, *J. Am. Chem. Soc.*, 2008, **130**, 15938-15943.
2. W. H. Bao and J. Ai, *Part. Part. Syst. Charact.*, 2023, **40**, 2300041.
3. L. M. Guo, C. S. Xiao, J. R. Li, X. Lin, N. Zhao, X. Y. Wang, L. J. Dong and X. H. Guo, *J. Am. Soc. Mass Spectrom.*, 2021, **32**, 2837-2841.
4. T. Chen, B. C. Li, B. C. Wang, X. Y. Luo, Z. Y. Fan, H. Zhao, J. Yang, B. Y. Ren, Y. P. Cai and R. F. Dong, *Mater. Today Nano*, 2023, **24**, 100413.
5. H. Wang, Z. Liu, J. Xiao, C. X. Li, J. L. Wang, X. J. Xiao, H. W. Huang, B. Shrestha, L. Tang, K. Q. Deng and H. Zhou, *Anal. Chem.*, 2021, **93**, 7292-7299.
6. Y. B. Zhang, S. Xia, S. L. Wan, T. E. Steenwinkel, T. Vohs, R. L. Luck, T. Werner and H. Y. Liu, *ChemBioChem*, 2021, **22**, 2282-2291.
7. K. P. Wang, G. Nie, S. Q. Ran, H. L. Wang, X. Q. Liu, Z. M. Zheng and Y. Zhang, *Dyes Pigm.*, 2020, **172**, 107837.
8. L. L. Lei, D. H. Song, L. H. Fan, B. Liu, M. Z. He, X. H. Sun, W. J. Xu, K. Tao, H. Huang and Y. X. Li, *Microchim. Acta*, 2022, **189**, 61.
9. X. W. Li, J. K. Qin and Y. C. Hu, *Microchem. J.*, 2023, **191**, 108763.
10. H. Khani, S. Abbasi, M. Tavakkoli Yarak and M. B. Gholivand, *Microchem. J.*, 2022, **173**, 107006.
11. X. J. Yang, R. S. Li, C. M. Li, Y. F. Li and C. Z. Huang, *Talanta*, 2020, **215**, 120928.
12. S. Cheraghi, M. A. Taher, H. Karimi-Maleh, F. Karimi, M. Shabani-Nooshabadi, M. Alizadeh, A. Al-Othman, N. Erk, P. K. Yegya Raman and C. Karaman, *Chemosphere*, 2022, **287**, 132187.
13. J. Z. Zhang, X. Liu, H. X. Liu, J. Z. Wang, Y. W. Zhang and W. B. Zhao, *Anal. Chim. Acta*, 2022, **1226**, 340251.
